# Supplementary material for: Conductive origin and design principles of electrically controllable high conductivity La-doped perovskites
Source: Royal Society of Chemistry journal article supplement (doi:10.1039/d3ta06845e), 2024-01-01
Supplement: d3ta06845e1.pdf [file d3ta06845e1.pdf]

# Electronic supplementary information

## Conductivity origin and design principles of electrically controllable high conductive La-doped perovskite

Xin Hu, Jingang Qi,\* Xing Fu, Juntao Liu, Sifan Qiao, Yong Gao, Rongda Zhao, Jian Shang, Liang Liu,  
Lidan Tang and Wei Zhang.

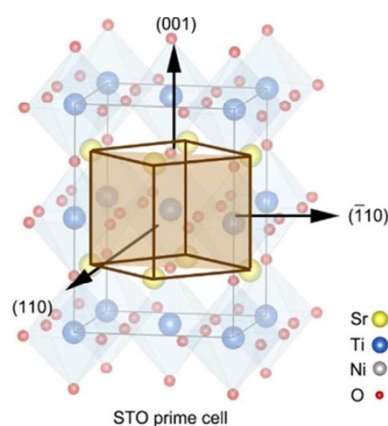

Fig. S1. SrTiO<sub>3</sub> (STO) primitive cell.<sup>1</sup>

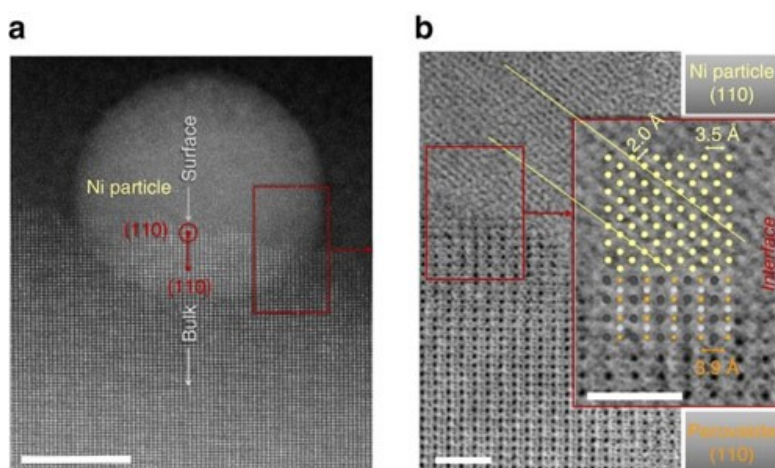

Fig. S2. (a) TEM micrograph (dark field) of a Ni particle exsolved on (110) native surface facet after ageing (~3% H<sub>2</sub>O/5% H<sub>2</sub>/Ar, 930 °C, 60 h); scale bar, 10 nm. (b) TEM micrograph detail (bright field) of the metal–perovskite interface highlighting the corresponding atomic planes and orientations; scale bars, 1 nm.<sup>2</sup>

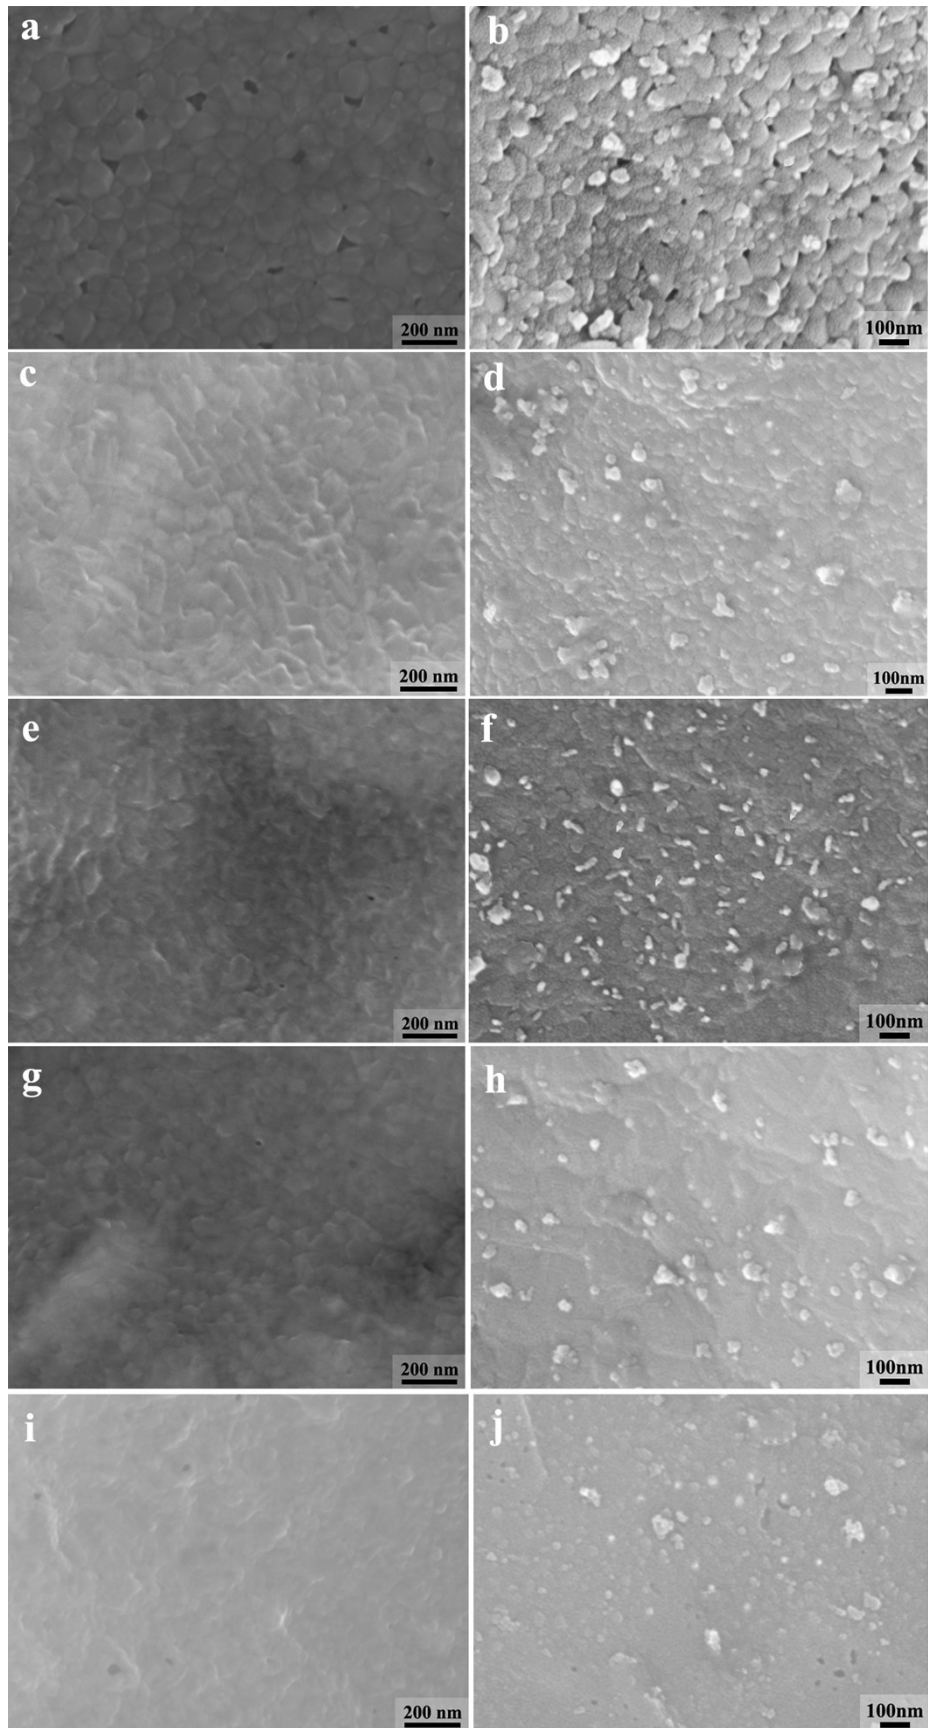

**Fig. S3.** SEM images of different La-doped samples before and after pulse electric current treatment comparing.

(a, b). La0, (c, d). La0.2, (e, f). La0.4, (g, h). La0.6, (i, j). La0.8.

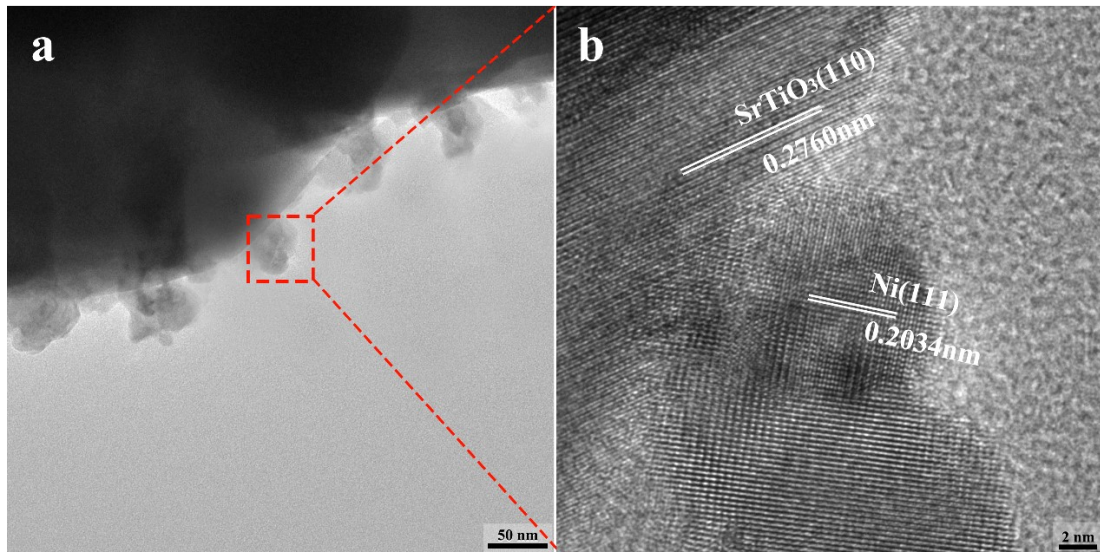

Fig. S4. Additional TEM images in this work demonstrate that Ni NPs exsolution.

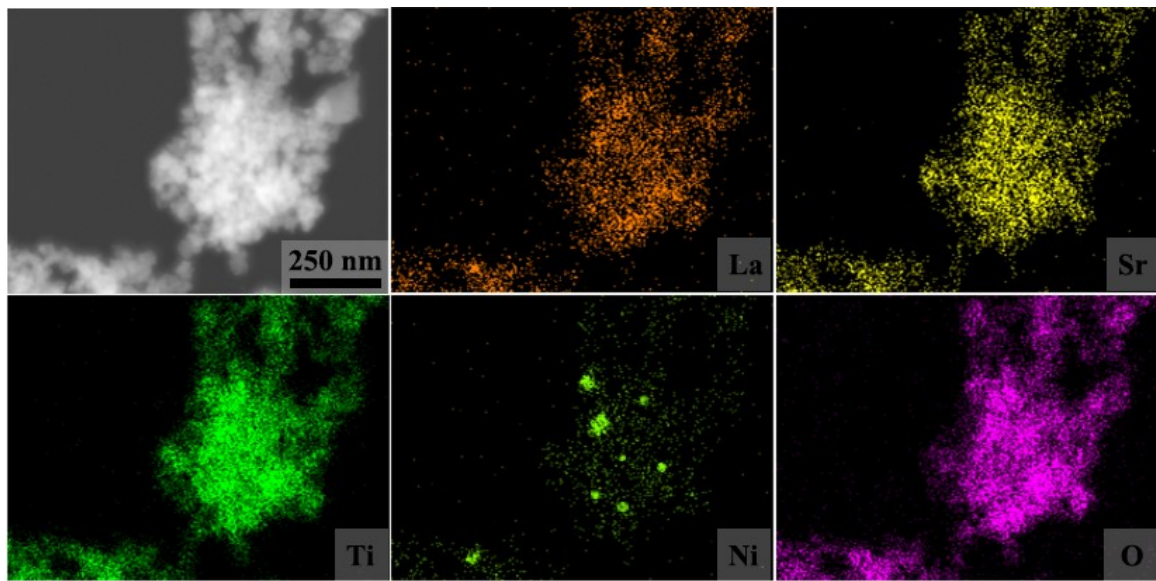

Fig. S5. the corresponding elemental mapping images of the LSTN.

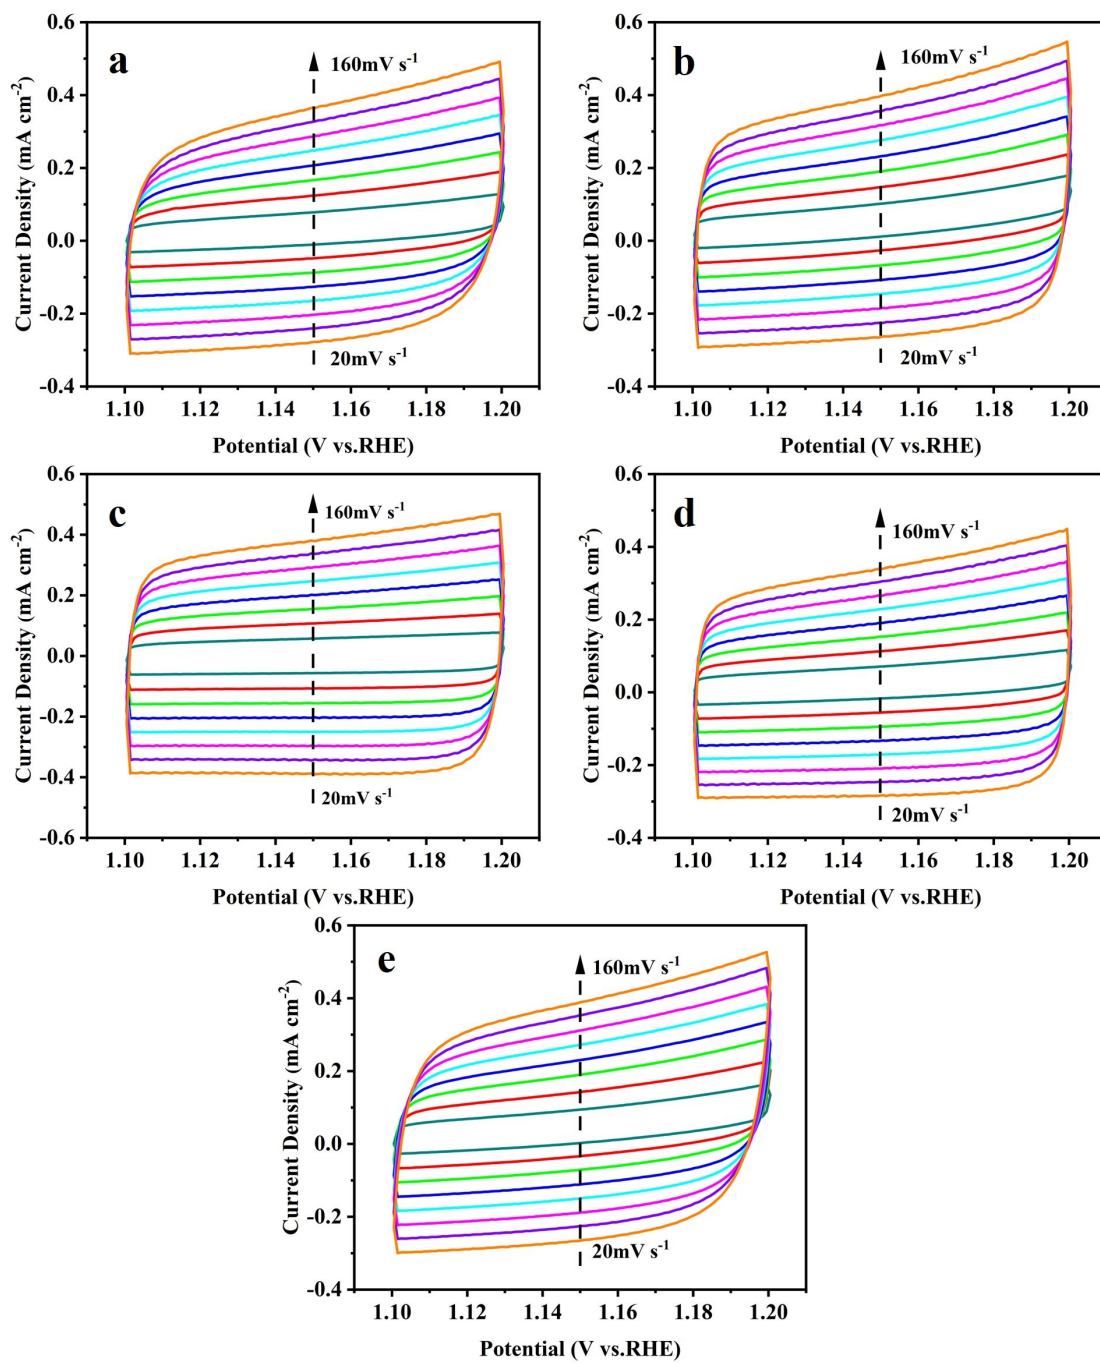

**Fig. S6.** Cyclic voltammetry (CV) graphs of (a). La0, (b). La0.2, (c). La0.4, (d). La0.6 and (e). La0.8 measured at different scan rates from 20 to 160 mV s<sup>-1</sup>.

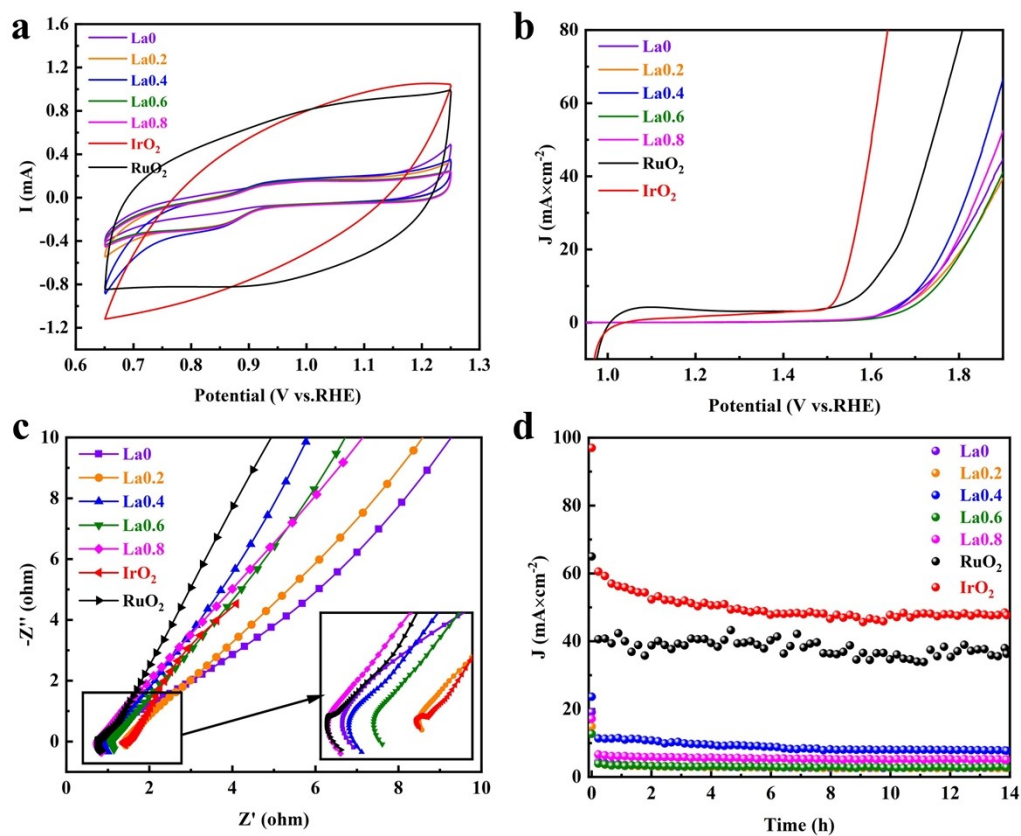

**Fig. S7.** Electrochemical curves of LSTN after PECINE, IrO<sub>2</sub> and RuO<sub>2</sub>. (a). CV. (b). LSV. (c). EIS. (d). i-t.

**Table S1** La doping quantity setting in model structure

| Number of La doping | La doping ratio |
|---------------------|-----------------|
| 0                   | 0/7=0           |
| 1                   | 1/7= 0.14285714 |
| 2                   | 2/7= 0.28571428 |
| 3                   | 3/7= 0.42857142 |
| 4                   | 4/7= 0.57142857 |
| 5                   | 5/7= 0.71428571 |
| 6                   | 6/7= 0.85714285 |

## References

- 1 Y. Gao, Z.H. Lu, T.L. You, J. Wang, L. Xie, J.Q. He, F. Ciucci, *J. Phys. Chem. Lett.*, 2018, **9**, 3772-3778.
- 2 D. Neagu, T.-S. Oh, D. Miller, H. Menard, S. Bukhari, S. Gamble, R. Gorte, J. Vohs, J. Irvine, *Nat. Commun.*, 2015, **6**, 8120.
